# Supplementary material for: Control of Hydraulic Pulse System Based on the PLC and State Machine Programming
Source: Preprints.org preprint supplement (doi:10.20944/preprints201809.0308.v1), 2018-09-17
Supplement: Supplementary file 1 [file supplementary]

## Sheet: 2.kalibarcia 
Druha kalibracia PQUBE 28.4.2014 (po namontovani brzdy a analogoveho snimaca tlaku)
Meraci program :	140427_AUTO_State_ver.3
Parametre cyklov : T0=5s,T1=5s,N=10 cyklov
					x	y
Tabulka 1	Nulovanie offsetu	Nastaveny tlak[ADU]	Tlak PLC[ADU]	Tlak WIKA [bar]	Tlak WIKA [bar]	Tlak PLC[ADU]
1	a	200	63	10.6	10.6	63
2	a	400	165	22.1	22.1	165
3	a	600	263	32.3	32.3	263
4	a	800	368	42.5	42.5	368
5	a	1000	465	52.1	52.1	465
6	a	1200	570	63	63	570
7	a	1400	675	73.7	73.7	675
8	a	1600	781	84.3	84.3	781
9	a	1800	885	95	95	885
10	a	2000	991	105.5	105.5	991
11	a	2200	1094	116.4	116.4	1094
12	a	2400	1196	127	127	1196
13	a	2600	1300	137.7	137.7	1300
14	a	2800	1405	148.2	148.2	1405
15	a	3000	1508	158.9	158.9	1508
16	a	3200	1613	169.5	169.5	1613
17	a	3400	1715	181.1
18	a	3600	1714	190.5
19	a	3800	1711	201.3
20	a	4000	1714	211.5
	Graf 1. Prevodova charakteristika medzi nameranym tlakom so snimacom WIKA (os y, bar) a snimacom ATE (os x, ADU)
								Tabulka 2
									Nastaveny tlak[ADU]	Tlak PLC[ADU]	Tlak WIKA [bar]	rovnica Tlak WIKA [bar] = 0,1021* tlak ATE[ADU] + 4,8074
								1	200	63	10.6	11.2397	106.035
								2	400	165	22.1	21.6539	97.9814
								3	600	263	32.3	31.6597	98.0176
								4	800	368	42.5	42.3802	99.7181
								5	1000	465	52.1	52.2839	100.353
								6	1200	570	63	63.0044	100.007
								7	1400	675	73.7	73.7249	100.034
								8	1600	781	84.3	84.5475	100.294
								9	1800	885	95	95.1659	100.175
								10	2000	991	105.5	105.989	100.463
								11	2200	1094	116.4	116.505	100.09
								12	2400	1196	127	126.919	99.9362
								13	2600	1300	137.7	137.537	99.8819
								14	2800	1405	148.2	148.258	100.039
	Kalibracna krivka snimaca hydraulickeho ATE v PQUBE - porovnanie							15	3000	1508	158.9	158.774	99.9208
	Prva kalibracia :		rovnica Tlak WIKA [bar] = 0,1027* tlak ATE[ADU] + 0,7916					16	3200	1613	169.5	169.495	99.9969
	Druha kalibracia :		rovnica Tlak WIKA [bar] = 0,1021* tlak ATE[ADU] + 4,8074					17	3400	1715	181.1	179.909	99.3423		nelinarita senzora ATE (nad 170 Bar)
								18	3600	1714	190.5	179.807	94.3868
			Konstanty do zdrojoveho kodu : A= 1021,B = 48074 (nasobia sa 10 000)					19	3800	1711	201.3	179.5	89.1706
								20	4000	1714	211.5	179.807	85.015
	Graf 2 Prevodova charakteristika medzi vystupnym tlakom v baroch (merane snimacom WIKA) a vstupom v ADU							Tabulka 3
									Nastaveny tlak[ADU]	Tlak WIKA [bar]	rovnica Tlak WIKA [bar] = 0,053*nastaveny tlak na vstupe [ADU] -0,0626	Chyba aproximacie
								1	200	10.6	10.5374	99.4094
								2	400	22.1	21.1374	95.6443
								3	600	32.3	31.7374	98.2582
								4	800	42.5	42.3374	99.6174
								5	1000	52.1	52.9374	101.607
								6	1200	63	63.5374	100.853
								7	1400	73.7	74.1374	100.593
								8	1600	84.3	84.7374	100.519
								9	1800	95	95.3374	100.355
								10	2000	105.5	105.937	100.415
								11	2200	116.4	116.537	100.118
								12	2400	127	127.137	100.108
								13	2600	137.7	137.737	100.027
								14	2800	148.2	148.337	100.093
								15	3000	158.9	158.937	100.024
								16	3200	169.5	169.537	100.022
								17	3400	181.1	180.137	99.4685
								18	3600	190.5	190.737	100.125
								19	3800	201.3	201.337	100.019
								20	4000	211.5	211.937	100.207
	Kalibracna krivka PQUBE - porovnanie
	Prva kalibracia :		rovnica Tlak WIKA [bar] = 0,0531*nastaveny tlak na vstupe [ADU] -3,56
	Druha kalibracia :		rovnica Tlak WIKA [bar] = 0,053*nastaveny tlak na vstupe [ADU] -0,0626
			Konstanty do zdrojoveho kodu : A= 531,B = -626 (nasobia sa 10 000)

## Sheet: 1.kalibarcia 
Meraci program :		140417_AUTO_State_ver.0
Approximacia : y[bar]=(A*x[ADU] + B)/1000						vysledna rovnica : y[bar] = (15,962/300)*(x[ADU]-300)+12,06
Parametre cyklov : T0=4s,T1=4s,N=10 cyklov
															15.912	-3.5269
Tabulka 1	Offset	Nulovanie offsetu	Nastaveny tlak[ADU]	Tlak PLC[ADU]	Tlak WIKA [bar]	Vypocet aproximaciou : tlak na vystupe PQUBE [bar] v zavislosti na vstupnom zadani v ADU [ADU]	Vypocet aproximaciou): tlak na vystupe PQUBE [bar] v zavislosti na vstupnom zadani v ADU [ADU] y[bar] = (15,962/300)*(x[ADU]-300)+12,06	Vypocet aproximaciou : - po uprave vzorca tlak na vystupe PQUBE [bar] v zavislosti na vstupnom zadani v ADU [ADU] y[bar]=0,0532*x[ADU]- 3,902		Tabulka 2	y[bar]	Vypocitane x[ADU] x[ADU]=(y[bar]+ 3,902)/ 0,0532	PLC tlak (bar)=(15,912*PLC tlak(ADU))/154,5)-3,5269	Chyba (100*TLAK WIKA/TLAK PLC)			rozdiel v predch hodn.x[ADU]
1	193	a	300	119	13	12.3851	12.06	12.058		1	13	317.707
2	193	a	600	267	28.1	28.2971	28.022	28.018		2	28.1	601.541	23.6828	118.651		148	283.835
3	193	a	900	420	44.2	44.2091	43.984	43.978		3	44.2	904.173	39.4898	111.928		153	302.632
4	193	a	1200	573	59.7	60.1211	59.946	59.938		4	59.7	1195.53	55.2969	107.963		153	291.353
5	193	a	1500	732	75.6	76.0331	75.908	75.898		5	75.6	1494.4	71.7238	105.404		159	298.872
6	193	a	1800	888	91.9	91.9451	91.87	91.858		6	91.9	1800.79	87.8408	104.621		156	306.391
7	193	a	2100	1042	107.9	107.857	107.832	107.818		7	107.9	2101.54	103.751	103.999		154	300.752
8	193	a	2400	1200	124	123.769	123.794	123.778		8	124	2404.17	120.075	103.269		158	302.632
9	193	a	2700	1356	139.8	139.681	139.756	139.738		9	139.8	2701.17	136.192	102.649		156	296.992
10	193	a	3000	1507	155.7	155.593	155.718	155.698		10	155.7	3000.04	151.792	102.575		151	298.872
11	193	a	3300	1664	171.6	171.505	171.68	171.658		11	171.6	3298.91	168.012	102.135		157	298.872
12	193	a	3600	1710	187.3	187.417	187.642	187.618		12	187.3	3594.02	172.765	108.413		46	295.113
13	193	a	3900	1712	203.3	203.329	203.604	203.578		13	203.3	3894.77	172.971	117.534		2	300.752
															AVER	154.5	298.089
	Graf 1. Prevodova charakteristika medzi nameranym tlakom so snimacom WIKA (os y, bar) a snimacom ATE (os x, ADU)
								Tabulka 4	Nastaveny tlak[ADU]	Tlak PLC[ADU]	Tlak WIKA [bar]	rovnica Tlak WIKA [bar] = 0,1027* tlak ATE[ADU] + 0,7916
								1	300	119	13	13.0129
								2	600	267	28.1	28.2125
								3	900	420	44.2	43.9256
								4	1200	573	59.7	59.6387
								5	1500	732	75.6	75.968
								6	1800	888	91.9	91.9892
								7	2100	1042	107.9	107.805
								8	2400	1200	124	124.032
								9	2700	1356	139.8	140.053
								10	3000	1507	155.7	155.56
								11	3300	1664	171.6	171.684
								12	3600	1710	187.3	176.409
								13	3900	1712	203.3	176.614
	Graf 2 Prevodova charakteristika medzi vystupnym tlakom v baroch (merane snimacom WIKA) a vstupom v ADU
								Tabulka 5	Nastaveny tlak[ADU]	Tlak WIKA [bar]	rovnica Tlak WIKA [bar] = 0,0531*nastaveny tlak na vstupe [ADU] -3,56	Chyba aproximacie
								1	300	13	12.37	95.1538
								2	600	28.1	28.3	100.712
								3	900	44.2	44.23	100.068
								4	1200	59.7	60.16	100.771
								5	1500	75.6	76.09	100.648
								6	1800	91.9	92.02	100.131
								7	2100	107.9	107.95	100.046
								8	2400	124	123.88	99.9032
								9	2700	139.8	139.81	100.007
								10	3000	155.7	155.74	100.026
								11	3300	171.6	171.67	100.041
								12	3600	187.3	187.6	100.16
								13	3900	203.3	203.53	100.113

## Sheet: Hárok1
Tlak WIKA [bar]	Signal from ATE PS60 [ADU]
10.6	63
22.1	165
32.3	263
42.5	368
52.1	465
63	570
73.7	675
84.3	781
95	885
105.5	991
116.4	1094
127	1196
137.7	1300
148.2	1405
158.9	1508
169.5	1613
